# Supplementary material
Source: PubMed Central journal article supplement (PMC2867727)
Supplement: 0913492107_pnas.200913492SI.pdf [file 0913492107_pnas.200913492SI.pdf]

# Supporting Information

Olson et al. 10.1073/pnas.0913492107

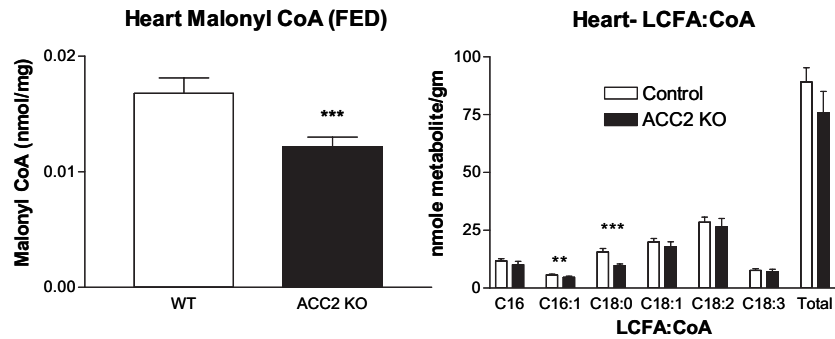

**Fig. S1.** Malonyl CoA and long chain fatty acyl coAs in hearts of fed animals were measured by mass spectroscopy. Controls  $n = 11$ ; Acc2KO  $n = 12$ . \*\* $P < 0.01$ , \*\*\* $P < 0.001$ .

**Table S1.**

| Metabolite            | Chow        |             | High fat diet |             |
|-----------------------|-------------|-------------|---------------|-------------|
|                       | Control     | Acc2KO      | Control       | Acc2KO      |
| Triglyceride, mg/dL   | 108.1 ± 2.8 | 113.8 ± 4.7 | 118.1 ± 3.7   | 119.8 ± 2.5 |
| NEFA, mEq/L           | 0.69 ± 0.08 | 0.88 ± 0.06 | 0.65 ± 0.03   | 0.63 ± 0.03 |
| β-hydroxybutyrate, mM |             |             |               |             |
| Ambient               | 0.47 ± 0.06 | 0.60 ± 0.07 | 0.32 ± 0.05   | 0.30 ± 0.04 |
| Fasting               | 2.00 ± 0.27 | 2.48 ± 0.16 |               |             |

Triglyceride and β-hydroxybutyrate concentrations were determined using Liquicolor assay kits from Stanbio. Fasting β-hydroxybutyrate was measured in serum after an overnight fast. NEFA concentrations were measured using NEFA assay kit from Wako Pure Chemical Industries. Data are presented as mean ± SEM (chow: control  $n = 7$ , Acc2KO  $n = 10$ ; high fat diet: control  $n = 9$ , Acc2KO  $n = 8$ ; fasting: control  $n = 5$ , Acc2KO  $n = 5$ ).
